# Supplementary material for: QSAR-guided semi-synthesis and in vitro validation of antiplasmodial activity in ursolic acid derivatives
Source: Royal Society of Chemistry journal article supplement (doi:10.1039/c4ra13709d), 2015-01-01
Supplement: c4ra13709d1.pdf [file c4ra13709d1.pdf]

**Table S1: Y-Randomization test and calculated  $r^2$  after each iteration**

| <b>Iteration</b> | <b><math>r^2</math> (Y-Randomization test)</b> |
|------------------|------------------------------------------------|
| 1                | 0.329378258                                    |
| 2                | 0.347681982                                    |
| 3                | 0.12162357                                     |
| 4                | 0.085622301                                    |
| 5                | 0.237224434                                    |
| 6                | 0.220029202                                    |
| 7                | 0.120013424                                    |
| 8                | 0.172224454                                    |
| 9                | 0.165351349                                    |
| 10               | 0.105436509                                    |
| 11               | 0.086930287                                    |
| 12               | 0.257243584                                    |
| 13               | 0.089143697                                    |
| 14               | 0.104073924                                    |
| 15               | 0.105507647                                    |
| 16               | 0.088130538                                    |
| 17               | 0.211016705                                    |
| 18               | 0.260167482                                    |
| 19               | 0.06924262                                     |
| 20               | 0.091524834                                    |
| 21               | 0.159399404                                    |
| 22               | 0.145202675                                    |
| 23               | 0.427415835                                    |
| 24               | 0.054272303                                    |
| 25               | 0.116197951                                    |
