# Supplementary material for: QSAR-guided semi-synthesis and in vitro validation of antiplasmodial activity in ursolic acid derivatives
Source: Royal Society of Chemistry journal article supplement (doi:10.1039/c4ra13709d), 2015-01-01
Supplement: c4ra13709d2.pdf [file c4ra13709d2.pdf]

**Table S2:** Training set compounds used to develop a QSAR model for antimalarial activity

| S. No. | Sample | Structure                                                                           | Activity IC <sub>50</sub> (µg/ml) | Reference                   |
|--------|--------|-------------------------------------------------------------------------------------|-----------------------------------|-----------------------------|
| 1      | 1      | 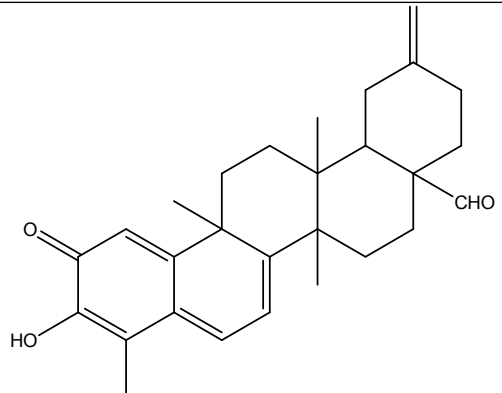  | 0.0799                            | Figueiredo et. al.,<br>1998 |
| 3      | 2      |  | 0.1402                            |                             |

|   |   |                                                                                     |        |                   |
|---|---|-------------------------------------------------------------------------------------|--------|-------------------|
| 7 | 3 | 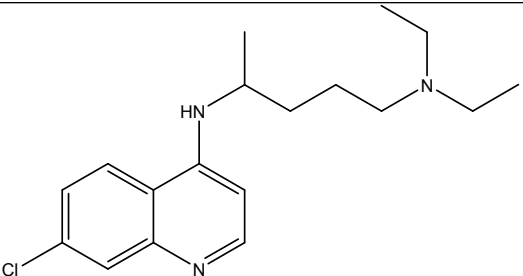  | 0.0046 |                   |
| 9 | 4 |  | 1.496  | Lee et. al., 2008 |

|    |   |                                                                                     |       |                     |
|----|---|-------------------------------------------------------------------------------------|-------|---------------------|
| 10 | 5 | 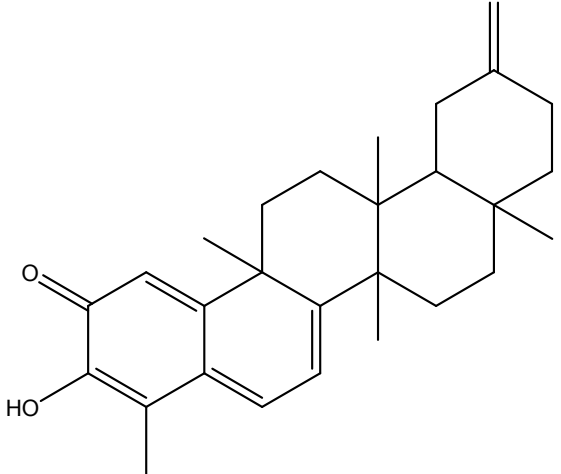  | 0.2   | Thiem et. al., 2005 |
| 15 | 6 |  | 9.974 | Ma et. al., 2006    |

|    |   |                                                                                                                                                                                                                                                                                                                                                                                                                                                         |        |                       |
|----|---|---------------------------------------------------------------------------------------------------------------------------------------------------------------------------------------------------------------------------------------------------------------------------------------------------------------------------------------------------------------------------------------------------------------------------------------------------------|--------|-----------------------|
| 16 | 7 | 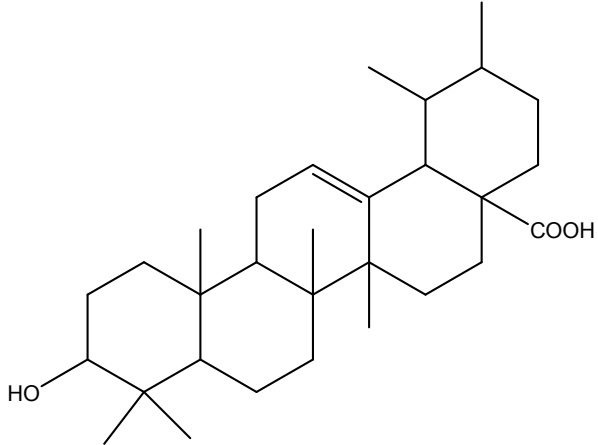 <p>The structure shows a complex polycyclic system with three fused six-membered rings. It features a hydroxyl group (HO) on the leftmost ring and a carboxylic acid group (COOH) on the rightmost ring. There are several methyl groups attached to the rings, and a double bond is present in the middle ring.</p>                                                 | 12.7   | Baren et. al., 2006   |
| 20 | 8 |  <p>The structure shows a complex polycyclic system with three fused six-membered rings. It features an acetate ester group (CH<sub>3</sub>COO-) on the leftmost ring and a long-chain amide group (-NH-) on the rightmost ring. The amide group is connected to a piperazine ring, which is further linked to a terminal primary amine group (-NH<sub>2</sub>).</p> | 0.3133 | Gnoatto et. al., 2008 |

24

9

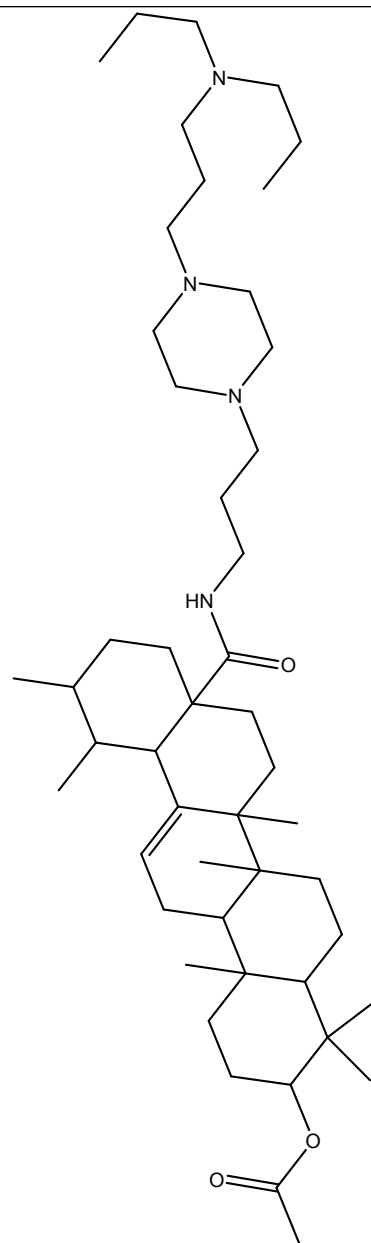

0.7652

|    |    |                                                                                                                                                                                                                                                                                                                                                                                                           |         |                                  |
|----|----|-----------------------------------------------------------------------------------------------------------------------------------------------------------------------------------------------------------------------------------------------------------------------------------------------------------------------------------------------------------------------------------------------------------|---------|----------------------------------|
| 27 | 10 | 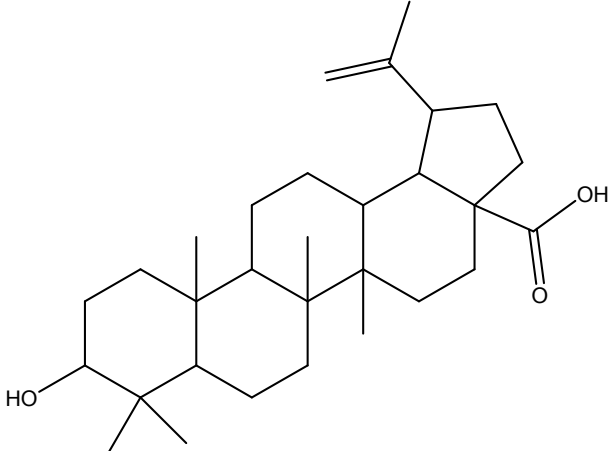 <p>The structure shows a complex polycyclic system consisting of several fused six-membered rings. A hydroxyl group (HO) is attached to one of the rings. A carboxylic acid group (-COOH) is attached to another ring. A vinyl group (-CH=CH<sub>2</sub>) is attached to a five-membered ring fused to the system.</p> | 10.2758 | Dom'inguez-Carmona et. Al., 2010 |
| 28 | 11 |  <p>The structure is similar to the one above, but instead of a hydroxyl group, it features an acetate group (-COOCH<sub>3</sub>) attached to one of the rings. The carboxylic acid group and the vinyl group are also present.</p>                                                                                    | 5.8851  |                                  |

|    |    |                                                                                                                                                                                                                                                                                                                                                                                                                       |        |                       |
|----|----|-----------------------------------------------------------------------------------------------------------------------------------------------------------------------------------------------------------------------------------------------------------------------------------------------------------------------------------------------------------------------------------------------------------------------|--------|-----------------------|
| 30 | 12 | 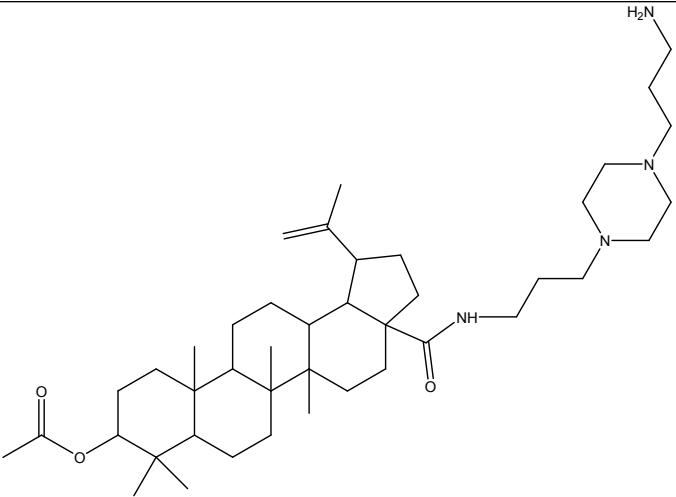 <p>The structure shows a complex polycyclic system consisting of several fused six-membered rings. A piperazine ring is attached to the system via a propyl chain, with a primary amine group (-NH<sub>2</sub>) extending from the piperazine ring. There are also methyl and isopropenyl substituents on the polycyclic core.</p> | 0.1498 | Innocente et. al 2012 |
| 36 | 13 |  <p>The structure features a complex polycyclic core with multiple fused rings. It includes a furan ring (five-membered oxygen-containing ring) and a lactone ring (six-membered ring with an internal ester group). There are also methyl and isopropenyl substituents on the polycyclic system.</p>                              | 5.39   | Bickii et. al., 2000  |

|    |    |                                                                                                                                                                                                                                                                                                                                                                                                                                        |      |  |
|----|----|----------------------------------------------------------------------------------------------------------------------------------------------------------------------------------------------------------------------------------------------------------------------------------------------------------------------------------------------------------------------------------------------------------------------------------------|------|--|
| 38 | 14 | 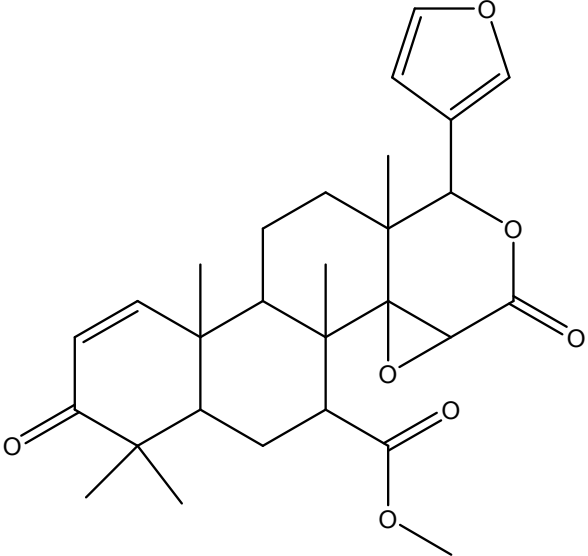 <p>Chemical structure of compound 38: A complex polycyclic molecule featuring a decalin core. It has a methyl group on the leftmost ring, a double bond on the rightmost ring, and a methyl group on the bridgehead carbon. A side chain is attached to the rightmost ring, containing a furfuryl group, a carbonyl group, and a methoxy group.</p> | 1.25 |  |
| 40 | 15 |  <p>Chemical structure of compound 40: A complex polycyclic molecule similar to compound 38, but with a hydroxyl group (OH) on the leftmost ring and an acetate group (CH<sub>3</sub>COO-) on the bridgehead carbon. The side chain is identical to compound 38, containing a furfuryl group, a carbonyl group, and a methoxy group.</p>            | 9.63 |  |



|    |    |                                                                                     |       |                    |
|----|----|-------------------------------------------------------------------------------------|-------|--------------------|
| 42 | 16 | 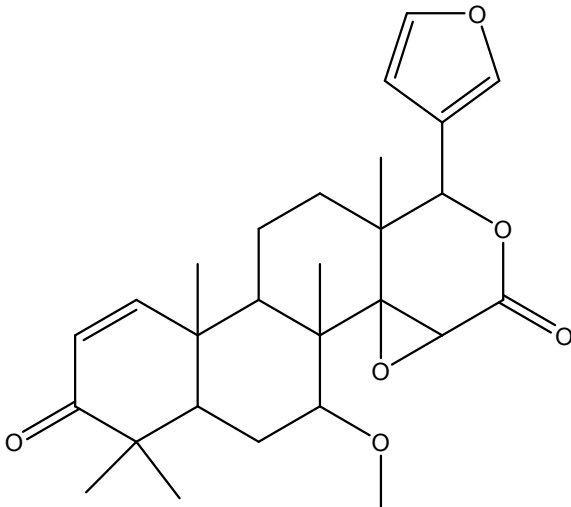  | 0.783 | Omar et. al., 2003 |
| 43 | 17 |  | 1.828 |                    |

|    |    |                                                                                                                                                                                                                                                                                                                               |     |                      |
|----|----|-------------------------------------------------------------------------------------------------------------------------------------------------------------------------------------------------------------------------------------------------------------------------------------------------------------------------------|-----|----------------------|
| 47 | 18 | 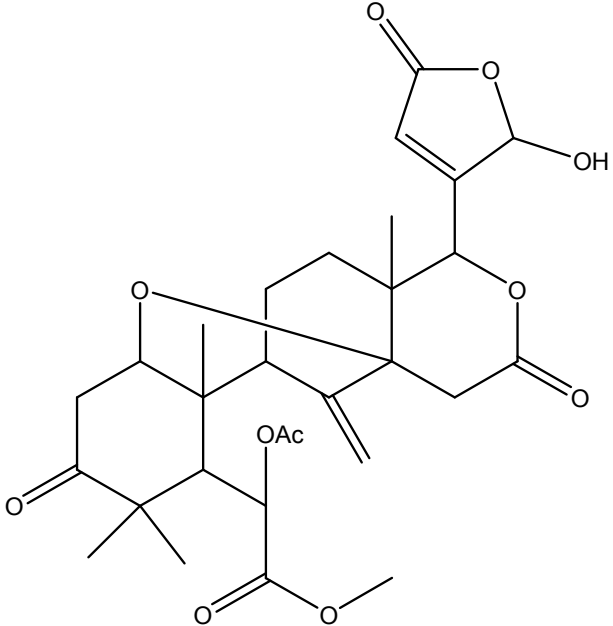 <p>The structure shows a complex polycyclic system with a furan ring attached to one of the rings. It features a methyl group, a vinyl group, and an acetate (OAc) group. A lactone ring is also present, fused to the main structure.</p> | 6.9 | Saewan et. al., 2006 |
| 53 | 19 |  <p>The structure shows a complex polycyclic system with two hydroxyl (HO) groups. It features a methyl group and a vinyl group. The rings are interconnected in a complex manner.</p>                                                     | 3.3 | Filho et. al., 2009  |

|    |    |                                                                                     |         |                     |
|----|----|-------------------------------------------------------------------------------------|---------|---------------------|
| 54 | 20 | 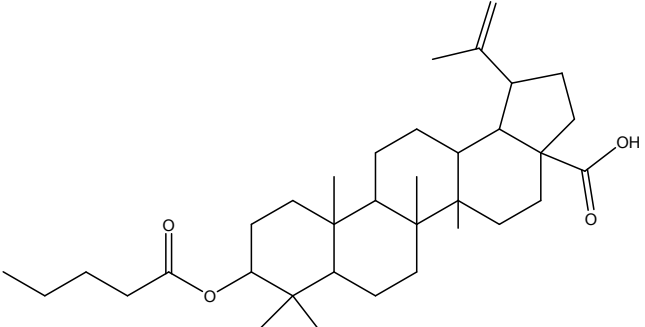  | 15.6838 | Silva et. al., 2013 |
| 55 | 21 |   | 23.7961 |                     |
| 59 | 22 |  | 36.7468 |                     |

|    |    |                                                                                     |         |  |
|----|----|-------------------------------------------------------------------------------------|---------|--|
| 61 | 23 | 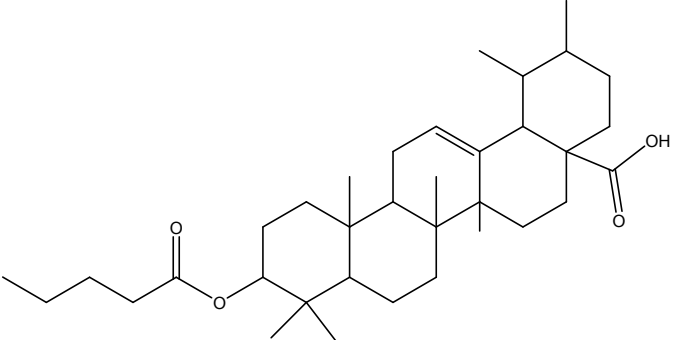  | 38.3982 |  |
| 62 | 24 |   | 38.939  |  |
| 64 | 25 |  | 32.2927 |  |
