# Supplementary material for: QSAR-guided semi-synthesis and in vitro validation of antiplasmodial activity in ursolic acid derivatives
Source: Royal Society of Chemistry journal article supplement (doi:10.1039/c4ra13709d), 2015-01-01
Supplement: c4ra13709d4.pdf [file c4ra13709d4.pdf]

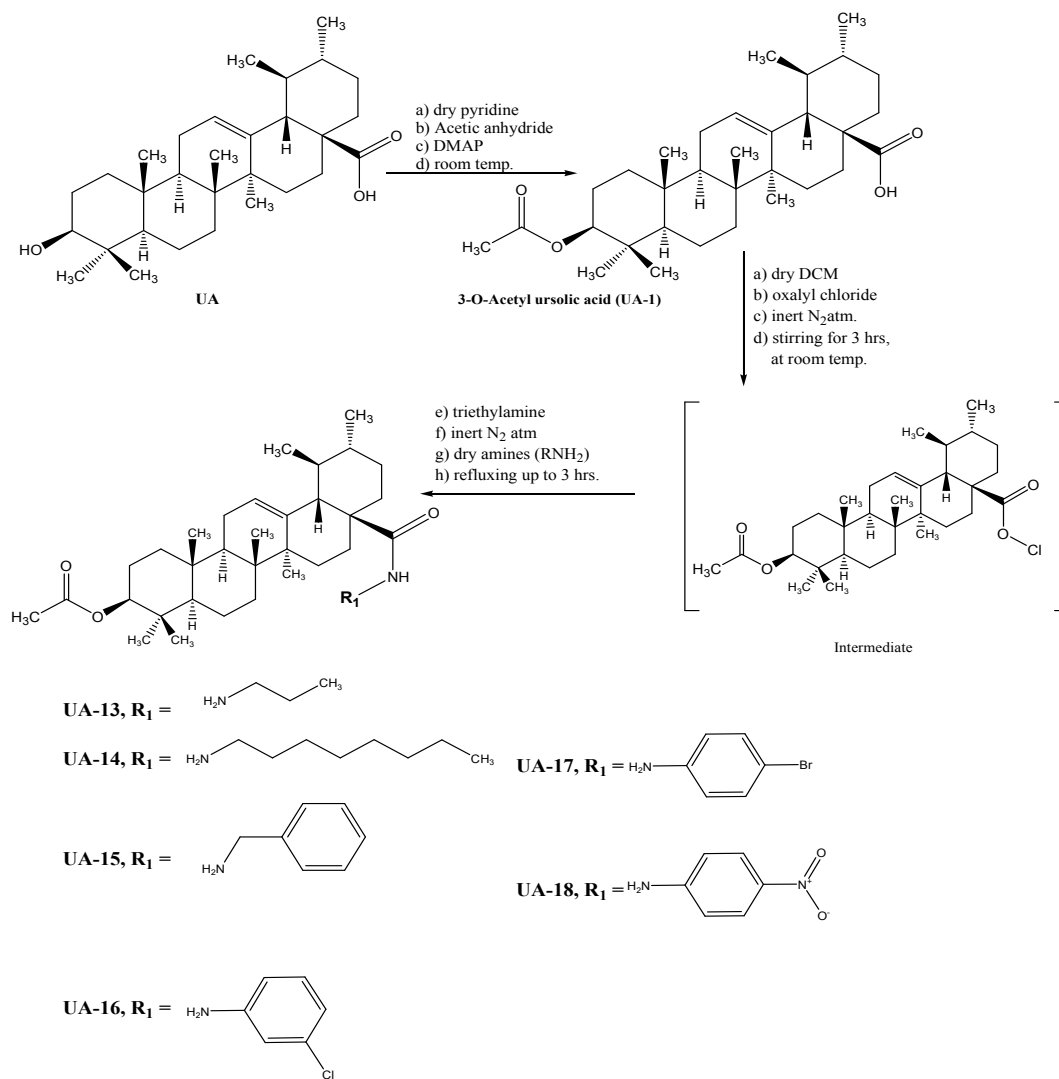

**Scheme-1:** The schematic mechanism of UA derivatives (UA-1 to UA-18)

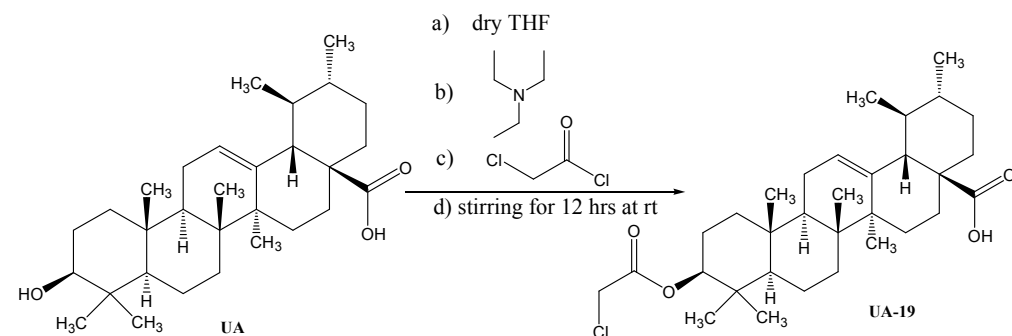

d) dry DMF  
 e)  $\text{K}_2\text{CO}_3$   
 f) dry amines/ anilines  
 g) stirring for >12 hrs at 25°C

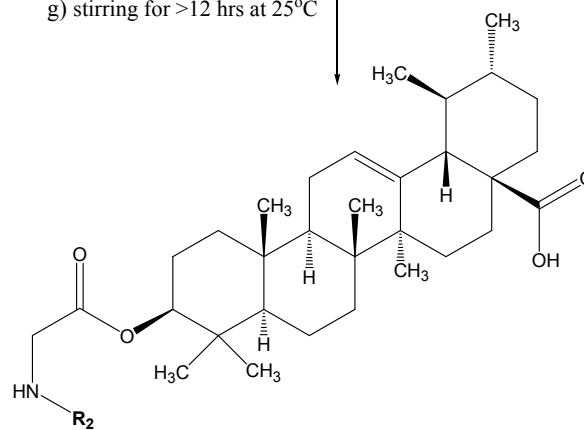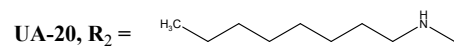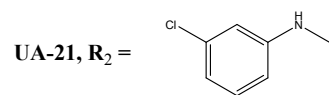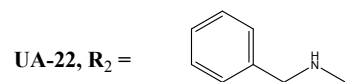

**Scheme-2:** The schematic mechanism of UA derivatives (UA-19 to UA-22).

**Semisynthesis of virtually active derivatives of UA:**

For the semisynthesis of amide derivatives of ursolic acid (UA) in alkaline conditions, the hydroxyl group of UA was protected with acetate. The protected 3-O-acetylursolic acid (UA-1) was obtained by reacting UA with acetic anhydride (2 equiv.) in the presence of dry pyridine. In Scheme 1, UA-1 was reacted with oxalyl chloride (1–2 equiv.) in dry dichloromethane (DCM) under a nitrogen atmosphere. After 3 h of stirring, the respective dry amines (1.5 equiv.) for amides were added under a nitrogen atmosphere. The resulting airtight reaction mixture was refluxed for 3-4 h and the progress of the reaction was monitored by TLC [CHCl<sub>3</sub>: MeOH, 9.5: 0.5], which resulted in the formation of the desired amide derivatives (10-11).

In Scheme 2, amines were substituted at position C-3 and total 3 derivatives were prepared (28). The products were further purified by column chromatography, which afforded the desired analogs in yields of 40–80%. All the analogs were characterized on the basis of their <sup>1</sup>H and <sup>13</sup>C NMR spectroscopic data (10-11).

**Propyl 3-O-acetyl-urs-12-en -28-amide (UA-13):**

<sup>1</sup>H NMR (CDCl<sub>3</sub>): δ 0.77, 0.78, 0.98, 1.09, 1.14 (3H each all s, 5 x tert.CH<sub>3</sub>) 0.92 & 0.96 (3 H each d, J=6.4 & 7.3 Hz, 2x sec CH<sub>3</sub>), 4.52 (1H, t, J= 8.1 Hz, 3 α-H), 5.30 (1H, m, H-12), 5.87 (1H, brs, NH), 3.31 (2H, m, C-1<sup>l</sup>), 1.92 (2H, m, C-2<sup>l</sup>) 0.78 (3H, brs c-8<sup>l</sup>), 1.25 (10 H, brs 3<sup>l</sup>-7<sup>l</sup>). <sup>13</sup>C NMR: 39.5 (C-1), 28.3 (C-2), 81.2 (C-3), 39.9 (C-4), 55.7 (C-5), 18.5 (C-6), 33.4 (C-7), 42.4 (C-8), 47.9 (C-9), 38.1 (C-10), 23.8 (C-11), 125.4 (C-12), 138.6 (C-13), 42.4 (C-14), 28.3 (C-15), 24.6 (C-16), 48.4 (C-17), 53.3 (C-18), 39.5 (C-19), 39.3 (C-20), 31.1 (C-21), 37.2 (C-22), 28.5

(C-23), 17.1 (C-24), 15.9 (C-25), 17.5 (C-26), 23.9 (C-27), 177.9 (C-28), 17.5 (C-29), 21.6 (C-30), 178.3 (C-31), 21.5 (C-32), 40.1 (C-1'), 33.2 (C-2'), 32.2 (C-3'), 29.6 (C-4'), 29.5 (C-5'), 27.21 (C-6'), 22.9 (C-7'), 14.4 (C-8')

**Octyl 3-O-acetyl-urs-12-en -28-amide (UA-14):**

<sup>1</sup>H NMR (CDCl<sub>3</sub>): δ 0.77.0.78, 0.98, 1.09, 1.14 (3H each all s, 5 x tert.CH<sub>3</sub>) 0.92 & 0.96 (3 H each d, J=6.4 & 7.3 Hz, 2x sec CH<sub>3</sub>), 4.52 (1H, t, J= 8.1 Hz, 3 α-H), 5.30 (1H, m, H-12), 5.87 (1H, brs, NH), 3.31 (2H, m, C-1<sup>l</sup>), 1.92 (2H, m, C-2<sup>l</sup>) 0.78 (3H, brs c-8<sup>l</sup>), 1.25 (10 H, brs 3<sup>l</sup>-7<sup>l</sup>). <sup>13</sup>C NMR: 39.5 (C-1), 28.3 (C-2), 81.2 (C-3), 39.9 (C-4), 55.7 (C-5), 18.5 (C-6), 33.4 (C-7), 42.4 (C-8), 47.9 (C-9), 38.1 (C-10), 23.8 (C-11), 125.4 (C-12), 138.6 (C-13), 42.4 (C-14), 28.3 (C-15), 24.6 (C-16), 48.4 (C-17), 53.3 (C-18), 39.5 (C-19), 39.3 (C-20), 31.1 (C-21), 37.2 (C-22), 28.5 (C-23), 17.1 (C-24), 15.9 (C-25), 17.5 (C-26), 23.9 (C-27), 177.9 (C-28), 17.5 (C-29), 21.6 (C-30), 178.3 (C-31), 21.5 (C-32), 40.1 (C-1'), 33.2 (C-2'), 32.2 (C-3'), 29.6 (C-4'), 29.5 (C-5'), 27.21 (C-6'), 22.9 (C-7'), 14.4 (C-8')

**Benzyl 3-O-acetyl-urs-12-en -28-amide (UA-15)**

<sup>1</sup>H NMR (CDCl<sub>3</sub>): δ 0.77.0.78, 0.98, 1.09, 1.14 (3H each all s, 5 x tert.CH<sub>3</sub>) 0.92 & 0.96 (3 H each d, J=6.4 & 7.3 Hz, 2x sec CH<sub>3</sub>), 4.52 (1H, t, J= 8.1 Hz, 3 α-H), 5.30 (1H, m, H-12), 5.87 (1H, brs, NH), 3.31 (2H, m, C-1<sup>l</sup>), 1.92 (2H, m, C-2<sup>l</sup>) 0.78 (3H, brs c-8<sup>l</sup>), 1.25 (10 H, brs 3<sup>l</sup>-7<sup>l</sup>). <sup>13</sup>C NMR: 39.5 (C-1), 28.3 (C-2), 81.2 (C-3), 39.9 (C-4), 55.7 (C-5), 18.5 (C-6), 33.4 (C-7), 42.4 (C-8), 47.9 (C-9), 38.1 (C-10), 23.8 (C-11), 125.4 (C-12), 138.6 (C-13), 42.4 (C-14), 28.3 (C-15), 24.6 (C-16), 48.4 (C-17), 53.3 (C-18), 39.5 (C-19), 39.3 (C-20), 31.1 (C-21), 37.2 (C-22), 28.5 (C-23), 17.1 (C-24), 15.9 (C-25), 17.5 (C-26), 23.9 (C-27), 177.9 (C-28), 17.5 (C-29), 21.6 (C-30), 178.3 (C-31), 21.5 (C-32), 40.1 (C-1'), 33.2 (C-2'), 32.2 (C-3'), 29.6 (C-4'), 29.5 (C-5'), 27.21 (C-6'), 22.9 (C-7'), 14.4 (C-8')

**3-chloro 3-O-acetyl-urs-12-en -28-anilamide (UA-16)**

<sup>1</sup>H NMR (CDCl<sub>3</sub>): δ 0.77.0.78, 0.98, 1.09, 1.14 (3H each all s, 5 x tert.CH<sub>3</sub>) 0.92 & 0.96 (3 H each d, J=6.4 & 7.3 Hz, 2x sec CH<sub>3</sub>), 4.52 (1H, t, J= 8.1 Hz, 3 α-H), 5.30 (1H, m, H-12), 5.87 (1H, brs, NH), 3.31 (2H, m, C-1<sup>l</sup>), 1.92 (2H, m, C-2<sup>l</sup>) 0.78 (3H, brs c-8<sup>l</sup>), 1.25 (10 H, brs 3<sup>l</sup>-7<sup>l</sup>). <sup>13</sup>C

NMR: 39.5 (C-1), 28.3 (C-2), 81.2 (C-3), 39.9 (C-4), 55.7 (C-5), 18.5 (C-6), 33.4 (C-7), 42.4 (C-8), 47.9 (C-9), 38.1 (C-10), 23.8 (C-11), 125.4 (C-12), 138.6 (C-13), 42.4 (C-14), 28.3 (C-15), 24.6 (C-16), 48.4 (C-17), 53.3 (C-18), 39.5 (C-19), 39.3 (C-20), 31.1 (C-21), 37.2 (C-22), 28.5 (C-23), 17.1 (C-24), 15.9 (C-25), 17.5 (C-26), 23.9 (C-27), 177.9 (C-28), 17.5 (C-29), 21.6 (C-30), 178.3 (C-31), 21.5 (C-32), 40.1 (C-1'), 33.2 (C-2'), 32.2 (C-3'), 29.6 (C-4'), 29.5 (C-5'), 27.21 (C-6'), 22.9 (C-7'), 14.4 (C-8')

#### **4-bromo 3-O-acetyl-urs-12-en -28-anilamide (UA-17)**

$^1\text{H}$  NMR ( $\text{CDCl}_3$ ):  $\delta$  0.77-0.78, 0.98, 1.09, 1.14 (3H each all s, 5 x tert. $\text{CH}_3$ ) 0.92 & 0.96 (3 H each d,  $J=6.4$  &  $7.3$  Hz, 2x sec  $\text{CH}_3$ ), 4.52 (1H, t,  $J=8.1$  Hz, 3  $\alpha$ -H), 5.30 (1H, m, H-12), 5.87 (1H, brs, NH), 3.31 (2H, m, C-1'), 1.92 (2H, m, C-2') 0.78 (3H, brs c-8'), 1.25 (10 H, brs 3'-7').  $^{13}\text{C}$  NMR: 39.5 (C-1), 28.3 (C-2), 81.2 (C-3), 39.9 (C-4), 55.7 (C-5), 18.5 (C-6), 33.4 (C-7), 42.4 (C-8), 47.9 (C-9), 38.1 (C-10), 23.8 (C-11), 125.4 (C-12), 138.6 (C-13), 42.4 (C-14), 28.3 (C-15), 24.6 (C-16), 48.4 (C-17), 53.3 (C-18), 39.5 (C-19), 39.3 (C-20), 31.1 (C-21), 37.2 (C-22), 28.5 (C-23), 17.1 (C-24), 15.9 (C-25), 17.5 (C-26), 23.9 (C-27), 177.9 (C-28), 17.5 (C-29), 21.6 (C-30), 178.3 (C-31), 21.5 (C-32), 40.1 (C-1'), 33.2 (C-2'), 32.2 (C-3'), 29.6 (C-4'), 29.5 (C-5'), 27.21 (C-6'), 22.9 (C-7'), 14.4 (C-8')

#### **4-nitro 3-O-acetyl-urs-12-en -28-anilamide (UA-18)**

$^1\text{H}$  NMR ( $\text{CDCl}_3$ ):  $\delta$  0.77-0.78, 0.98, 1.09, 1.14 (3H each all s, 5 x tert. $\text{CH}_3$ ) 0.92 & 0.96 (3 H each d,  $J=6.4$  &  $7.3$  Hz, 2x sec  $\text{CH}_3$ ), 4.52 (1H, t,  $J=8.1$  Hz, 3  $\alpha$ -H), 5.30 (1H, m, H-12), 5.87 (1H, brs, NH), 3.31 (2H, m, C-1'), 1.92 (2H, m, C-2') 0.78 (3H, brs c-8'), 1.25 (10 H, brs 3'-7').  $^{13}\text{C}$  NMR: 39.5 (C-1), 28.3 (C-2), 81.2 (C-3), 39.9 (C-4), 55.7 (C-5), 18.5 (C-6), 33.4 (C-7), 42.4 (C-8), 47.9 (C-9), 38.1 (C-10), 23.8 (C-11), 125.4 (C-12), 138.6 (C-13), 42.4 (C-14), 28.3 (C-15), 24.6 (C-16), 48.4 (C-17), 53.3 (C-18), 39.5 (C-19), 39.3 (C-20), 31.1 (C-21), 37.2 (C-22), 28.5 (C-23), 17.1 (C-24), 15.9 (C-25), 17.5 (C-26), 23.9 (C-27), 177.9 (C-28), 17.5 (C-29), 21.6 (C-30), 178.3 (C-31), 21.5 (C-32), 40.1 (C-1'), 33.2 (C-2'), 32.2 (C-3'), 29.6 (C-4'), 29.5 (C-5'), 27.21 (C-6'), 22.9 (C-7'), 14.4 (C-8')

### **3-O-Chloro acetyl -urs-12-en -28-oic acid (UA-19)**

<sup>1</sup>H NMR (CDCl<sub>3</sub>): 5.28 (1H, m, H-12), 4.5 (1H, m, H-3), 4.03 & 4.07 (2H, two d, J = 14.6 Hz, -COOCH<sub>2</sub>Cl), 2.2 (1H, d, J = 9.9 Hz, H-18 β).  
<sup>13</sup>C NMR: 39.5 (C-1), 28.3 (C-2), 78.7 (C-3), 79.9 (C-4), 56.3 (C-5), 19.1 (C-6), 39.9 (C-7), 40.4 (C-8), 47.0 (C-9), 37.7 (C-10), 23.9 (C-11), 123.0 (C-12), 139.6 (C-13), 42.9 (C-14), 28.9 (C-15), 25.2 (C-16), 48.5 (C-17), 54.0 (C-18), 30.5 (C-19), 39.7 (C-20), 31.3 (C-21), 37.6 (C-22), 29.0 (C-23), 15.8 (C-24), 16.4 (C-25), 17.5 (C-26), 24.1 (C-27), 179.7 (C-28), 17.7 (C-29), 21.4 (C-30) 165.4 (C-1''), 46.4 (C-2'').

### **3-O- octylamide -urs-12-en -28-oic acid (UA-20)**

<sup>1</sup>H NMR (CDCl<sub>3</sub>): 5.29 (1H, m, H-12), 3.9 (1H, m, H-3), 3.4 (2H, d, -COOCH<sub>2</sub>), 2.4 (1H, brs, NH), 2.1 (2H, m, C-1''), 1.05 (2H, m C-2''), 1.25-1.39 (H, brs 3''-7''), 0.98 (3H, brs C-8''). <sup>13</sup>C NMR: 39.5 (C-1), 28.3 (C-2), 78.7 (C-3), 79.9 (C-4), 56.3 (C-5), 19.1 (C-6), 39.9 (C-7), 40.4 (C-8), 47.0 (C-9), 37.7 (C-10), 23.9 (C-11), 123.0 (C-12), 139.6 (C-13), 42.9 (C-14), 28.9 (C-15), 25.2 (C-16), 48.5 (C-17), 54.0 (C-18), 30.5 (C-19), 39.7 (C-20), 31.3 (C-21), 37.6 (C-22), 29.0 (C-23), 15.8 (C-24), 16.4 (C-25), 17.5 (C-26), 24.1 (C-27), 179.7 (C-28), 17.7 (C-29), 21.4 (C-30), 169.8 (C-1'), 55.4 (C-2'), 42.2-13.7 (C-1''- C-8'').

### **3-O- 3-chloroanilamide-urs-12-en -28-oic acid (UA-21)**

<sup>1</sup>H NMR (CDCl<sub>3</sub>): 5.29 (1H, m, H-12), 3.9 (1H, m, H-3), 3.4 (2H, d, -COOCH<sub>2</sub>), 4.4 (1H, brs, NH), 6.4 (H, Ar, C-2''), 6.7 (H, Ar, C-4''), 7.4 (H, Ar, C-5''), 6.9 (H, Ar C-6''). <sup>13</sup>C NMR: 39.5 (C-1), 28.3 (C-2), 78.7 (C-3), 79.9 (C-4), 56.3 (C-5), 19.1 (C-6), 39.9 (C-7), 40.4 (C-8), 47.0 (C-9), 37.7 (C-10), 23.9 (C-11), 123.0 (C-12), 139.6 (C-13), 42.9 (C-14), 28.9 (C-15), 25.2 (C-16), 48.5 (C-17), 54.0 (C-18), 30.5 (C-19), 39.7 (C-20), 31.3 (C-21), 37.6 (C-22), 29.0 (C-23), 15.8 (C-24), 16.4 (C-25), 17.5 (C-26), 24.1 (C-27), 179.7 (C-28), 17.7 (C-29), 21.4 (C-30), 169.9 (C-1'), 56.1 (C-2'), 142.3 (C-1''), 111.9 (C-2''), 134.3 (C-3''), 115.8 (C-4''), 129.7 (C-5''), 109.6 (C-6'').

### **3-O- Benzylamide -urs-12-en -28-oic acid (UA-22)**

$^1\text{H}$  NMR ( $\text{CDCl}_3$ ): 5.29 (1H, m, H-12), 3.9 (1H, m, H-3), 3.4 (2H, d,  $-\text{COOCH}_2$ ), 2.54 (1H, brs, NH), 3.8 (2H, s,  $-\text{CH}_2-$ ), 7.1-7.5 (H, Ar, C-2-6).  
 $^{13}\text{C}$  NMR: 39.5 (C-1), 28.3 (C-2), 78.7 (C-3), 79.9 (C-4), 56.3 (C-5), 19.1 (C-6), 39.9 (C-7), 40.4 (C-8), 47.0 (C-9), 37.7 (C-10), 23.9 (C-11), 123.0 (C-12), 139.6 (C-13), 42.9 (C-14), 28.9 (C-15), 25.2 (C-16), 48.5 (C-17), 54.0 (C-18), 30.5 (C-19), 39.7 (C-20), 31.3 (C-21), 37.6 (C-22), 29.0 (C-23), 15.8 (C-24), 16.4 (C-25), 17.5 (C-26), 24.1 (C-27), 179.7 (C-28), 17.7 (C-29), 21.4 (C-30), 169.9 (C-1'), 55.4 (C-2'), 52.8 (Bz- $\text{CH}_2$ ), 136.5 (C-1''), 126.7 (C-2'', C-6''), 127.3 (C-3'', C-5''), 125.1 (C-4'').
